# Supplementary material
Source: publisher figshare collection journal article supplement (https://future-science-group.figshare.com/ndownloader/files/34326674)
Supplement: Supplementary file 1 [file 34326674]

**First-line chemotherapy plus ICIs or bevacizumab in advanced non-squamous NSCLC without EGFR mutations or ALK fusions**

**SUPPLEMENT: TABLES AND FIGURES**

# Table S9: Literature search strategies

Pubmed

| １ | Search((((((Bevcizumab[Title/Abstract]) OR avastin[Title/Abstract]) OR Antiangiogenesis[Title/Abstract] Sort by: [pubsolr12] | 20761 |
| --- | --- | --- |
| ２ | Search(((((((((((((((((Pembrolizumab[Title/Abstract]) OR MK-3475[Title/Abstract]) OR MK3475[Title/Abstract]) OR lambrolizumab[Title/Abstract]) OR Keytruda[Title/Abstract]) OR Durvalumab[Title/Abstract]) OR MEDI-4736[Title/Abstract]) OR MEDI4736[Title/Abstract]) OR Atezolizumab[Title/Abstract]) OR MPDL-3280A[Title/Abstract]) OR MPDL3280A[Title/Abstract]) OR Avelumab[Title/Abstract]) OR Bavencio[Title/Abstract]) OR MSB-0010718C[Title/Abstract]) OR MSB0010718C[Title/Abstract]) OR Nivolumab[Title/Abstract]) OR opdivo[Title/Abstract]) OR tremelimumab[Title/Abstract]) OR immunotherapy[Title/Abstract] Sort by: [pubsolr12] | 84443 |
| ３ | Search ((((((((non-small-cell lung cancer[Title/Abstract]) OR non-small cell lung cancer[Title/Abstract]) OR non small-cell lung cancer[Title/Abstract]) OR non small cell lung cancer[Title/Abstract]) OR non-small-cell lung carcinoma[Title/Abstract]) OR non-small cell lung carcinoma[Title/Abstract]) OR non small-cell lung carcinoma[Title/Abstract]) OR non small cell lung carcinoma[Title/Abstract]) OR nsclc[Title/Abstract] Sort by: [pubsolr12] | 65066 |
| ４ | Search (((((((((((((((((((((((((((Pemetrexed)[Title/Abstract] OR alimta)[Title/Abstract] OR Etoposide)[Title/Abstract] OR etopophos)[Title/Abstract] OR VP-16)[Title/Abstract] OR VP16)[Title/Abstract] OR Taxane)[Title/Abstract] OR paclitaxel)[Title/Abstract] OR nabpaclitaxel)[Title/Abstract] OR Abraxane)[Title/Abstract] OR Taxol)[Title/Abstract] OR Albumin-bound paclitaxel)[Title/Abstract] OR Platinum)[Title/Abstract] OR cis-platinum)[Title/Abstract] OR Carboplatin)[Title/Abstract] OR cisplatin)[Title/Abstract] OR vinorelbine)[Title/Abstract] OR Vinca)[Title/Abstract] OR alkaloid)[Title/Abstract] OR Vinblastine)[Title/Abstract] OR navelbine)[Title/Abstract] OR NVB)[Title/Abstract] OR docetaxel)[Title/Abstract] OR taxoterel)))[Title/Abstract] OR Chemotherapy[Title/Abstract]) Sort by: [pubsolr12] | 915663 |
| ５ | Search ((((((Randomized Controlled Trial[Title/Abstract]) OR controlled clinical trial[Title/Abstract]) OR randomized[Title/Abstract]) OR randomised[Title/Abstract]) OR randomly[Title/Abstract]) OR phase[Title/Abstract]) OR trial[Title/Abstract] Sort by: [pubsolr12] | 2044495 |
| ６ | 2 and 3 and 4 and 5 | 536 |
| ７ | 1 and 3 and 4 and 5 | 530 |
| ８ | ６ Filters: Review; Publication date from 2000/01/01 to 2020/10/11 Sort by: [pubsolr12] | 195 |
| ９ | ７Filters: Review; Publication date from 2000/01/01 to 2020/04/03 Sort by: [pubsolr12] | 183 |
| 10 | Search (((((((((((adjuvant[Title]) OR 'single-arm'[Title]) OR EGFR-TKI[Title]) OR EGFR-TKIs[Title]) OR Erlotinib[Title]) OR gefitinib[Title]) OR Icotinib[Title]) OR Afatinib[Title]) OR Dacomitinib[Title]) OR Osimertinib[Title]) OR cost-effectiveness[Title]) OR “case report"[Title] Filters: Publication date from 2000/01/01 to 2020/11/1 Sort by: [pubsolr12] | 299900 |
| 11 | 6 not 8 not 10 AND (("2000/1/1"[Date - Publication] : "3000"[Date - Publication])) Filters: English Sort by: Most Recent | 285 |
| 12 | ７not 8 not 10 AND (("2000/1/1"[Date - Publication] : "3000"[Date - Publication])) Filters: English Sort by: Most Recent | 290 |

EMbase:

| １ | neoadjuvant:ti OR Chemoradiation:ti OR radiotherapy:ti OR 'meeting report':ti | 114106 |
| --- | --- | --- |
| ２ | 'maintenance therapy':ti | 4363 |
| ３ | retrospective:ti | 109191 |
| ４ | 'induction Chemotherapy':ti | 3268 |
| ５ | 'pharmacogenomic study':ti | 67 |
| ６ | surgery:ti | 453490 |
| ７ | experience:ti | 273035 |
| ８ | experiences:ti | 69422 |
| ９ | review:ti OR overeview:ti OR 'meta-analysis':ti OR 'egfr-tki':ti OR erlotinib:ti OR gefitinib:ti OR icotinib:ti OR afatinib:ti OR dacomitinib:ti OR osimertinib:ti OR 'cost-effectiveness':ti OR 'alk-positive':ti OR 'cost-utility':ti OR 'case report':ti OR 'real-world':ti OR approval:ti | 924682 |
| 10 | adjuvant:ti | 46524 |
| 11 | 'neo-adjuvant':ti | 1337 |
| 12 | Chemoradiotherapy:ti | 10589 |
| 13 | 'current status':ti OR advances:ti OR 'new drugs':ti OR radiation:ti | 248291 |
| 14 | 'systemetic therapy':ti OR 'systemetic treatment':ti OR survey:ti OR conference:ti OR 'pooled analysis':ti OR predict:ti OR management:ti OR resistance:ti OR pathway:ti | 1137229 |
| 15 | 'single-arm':ti | 2022 |
| 16 | 'systemic treatment':ti OR 'systemic therapy':ti OR tkis:ti OR 'egfr inhibitor':ti OR 'egfr-tkis':ti OR 'target therapy':ti OR meeting:ti OR asco:ti OR esmo:ti | 56656 |
| 17 | 'second-line':ti | 6713 |
| 18 | 1 or 2 or 3 or 4 or 5 or 6 or 7 or 8 or 9 or 10 or 11 or 12 or 13 or 14 or 15 or 16 or 17 | 3263583 |
| 19 | Bevcizumab:ab,ti OR avastin:ab,ti OR antiangiogenesis:ab,ti | 31462 |
| 20 | 'non-small-cell lung cancer':ab,ti OR 'non-small cell lung cancer':ab,ti OR 'non small-cell lung cancer':ab,ti OR 'non small cell lung cancer':ab,ti OR 'non-small-cell lung carcinoma':ab,ti OR 'non-small cell lung carcinoma':ab,ti OR 'non small-cell lung carcinoma':ab,ti OR 'non small cell lung carcinoma':ab,ti OR nsclc:ab,ti | 106442 |
| 21 | pembrolizumab:ti,ab OR 'mk 3475':ti,ab OR mk3475:ti,ab OR lambrolizumab:ti,ab OR keytruda:ti,ab OR durvalumab:ti,ab OR 'medi 4736':ti,ab OR medi4736:ti,ab OR atezolizumab:ti,ab OR 'mpdl 3280a':ti,ab OR mpdl3280a:ti,ab OR avelumab:ti,ab OR bavencio:ti,ab OR 'msb 0010718c':ti,ab OR msb0010718c:ti,ab OR nivolumab:ti,ab OR opdivo:ti,ab OR tremelimumab:ti,ab OR immunotherapy:ti,ab | 128002 |
| 22 | pemetrexed:ab,ti OR alimta:ab,ti OR etoposide:ab,ti OR etopophos:ab,ti OR 'vp-16':ab,ti OR vp16:ab,ti OR taxane:ab,ti OR paclitaxel:ab,ti OR 'nabpaclitaxel':ab,ti OR abraxane:ab,ti OR taxol:ab,ti OR 'albumin-bound paclitaxel':ab,ti OR platinum:ab,ti OR 'cis-platinum':ab,ti OR carboplatin:ab,ti OR cisplatin:ab,ti OR vinorelbine:ab,ti OR vinca:ab,ti OR alkaloid:ab,ti OR vinblastine:ab,ti OR navelbine:ab,ti OR nvb:ab,ti OR docetaxel:ab,ti OR taxotere:ab,ti OR Chemotherapy:ab,ti | 710399 |
| 23 | 20 and 21 and 22 | 3623 |
| 24 | 23 and [randomized controlled trial]/lim AND [embase]/lim AND [2000-2020]/py | 550 |
| 25 | 24 not 18 AND [english]/lim | 417 |
| 26 | 19 and 20 and 22 | 2178 |
| 27 | 26 and [randomized controlled trial]/lim AND [embase]/lim AND [2000-2020]/py | 233 |
| 28 | 27 not 18 AND [english]/lim | 122 |

Cochrane:

| １ | ((Pemetrexed OR alimta OR Etoposide OR etopophos OR VP-16 OR VP16 OR Taxane OR paclitaxel OR nabpaclitaxel OR Abraxane OR Taxol OR Albumin-bound paclitaxel OR Platinum OR cis-platinum OR Carboplatin OR cisplatin OR vinorelbine OR Vinca OR alkaloid OR Vinblastine OR navelbine OR NVB OR docetaxel OR taxotere or Chemotherapy)):ab AND ("non-small-cell lung cancer" OR "non-small cell lung cancer" OR "non small-cell lung cancer" OR "non small cell lung cancer" OR "non-small-cell lung carcinoma" OR "non-small cell lung carcinoma" OR "non small-cell lung carcinoma" OR "non small cell lung carcinoma" OR nsclc):ab AND (Pembrolizumab OR MK-3475 OR MK3475 OR lambrolizumab OR Keytruda OR Durvalumab OR MEDI-4736 OR MEDI4736 OR Atezolizumab OR MPDL-3280A OR MPDL3280A OR Avelumab OR Bavencio OR MSB-0010718C OR MSB0010718C OR Nivolumab OR opdivo OR tremelimumab or immunotherapy):ab AND ('Randomized Controlled Trial' OR 'controlled clinical trial' OR randomized OR randomised OR randomly OR phase OR trial):ab | 800 |
| --- | --- | --- |
| ２ | (Bevcizumab OR avastin OR Antiangiogenesis):ab AND (Pemetrexed OR alimta OR Etoposide OR etopophos OR “VP-16” OR VP16 OR Taxane OR paclitaxel OR “nabpaclitaxel” OR Abraxane OR Taxol OR “Albumin-bound paclitaxel”OR Platinum OR“cis-platinum”OR Carboplatin OR cisplatin OR vinorelbine OR Vinca OR alkaloid OR Vinblastine OR navelbine OR NVB OR docetaxel OR taxotere OR Chemotherapy):ab AND ("non-small-cell lung cancer" OR "non-small cell lung cancer" OR "non small-cell lung cancer" OR "non small cell lung cancer" OR "non-small-cell lung carcinoma" OR "non-small cell lung carcinoma" OR "non small-cell lung carcinoma" OR "non small cell lung carcinoma" OR nsclc):ab | 811 |
| ３ | (database or comment or predict or 'pooled analysis' or conference or 'target therapy' or 'systemic therapy' or 'systemic treatment' or 'predictors' or 'second-line' or meeting or 'single-arm' or survey or radiation or Chemoradiotherapy or 'neo-adjuvant' or adjuvant or EGFR-TKIs or EGFR-TKI or erlotinib OR gefitinib OR icotinib OR afatinib OR dacomitinib OR osimertinib OR 'cost-effectiveness' OR 'alk-positive' OR 'cost-utility' OR 'case report' OR 'real-world' OR approval):ti | 56117 |
| ４ | １ not ３with Publication Year from 2000 to present , in Trials | 685 |
| ５ | ２ not ３with Publication Year from 2000 to present , in Trials | 740 |

**List of figures:**

**Figure S1:** Forest plots for results of pairwise meta-analyses for Overall survival, progression-free survival in all population.

**Figure S2:** Network meta-analysis of specific regimens of progression-free survival in random effect model or excluded IMpower150.

**Figure S3:** Subgroup analysis of overall survival and progression-free survival for specific regimens.

**List of tables:**

**Table S1:** Quality assessment: risk of bias according to Cochrane Collaboration’s tool

**Table S2:** Comparisons of the fit of consistency and inconsistency models using deviance information criteria (DIC).

**Table S3:** Heterogeneity analysis of direct and indirect outcomes.

**Table S4:** Rank probability of progression-free survival for specific regimens excluded IMpower150 study.

**Table S5:** Bayesian ranking results of network meta-analysis of different treatment models in whole population.

**Table S6:** Bayesian ranking results of network meta-analysis of different treatment models in subgroups.

**Table S7:** Rank probability of overall survival, progression-free survival,objective response rate and 3-5 grade treatment related adverse events for specific regimens in whole population.

**Table S8:** Rank probability of overall survival and progression-free survival for specific regimens in subgroups.

**Figure S1:** Forest plots for results of pairwise meta-analyses for Overall survival, progression free survival in all population.

1. Overall survival B.progression-free survival


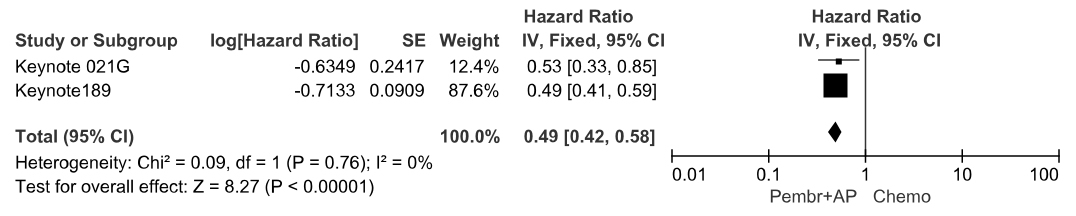


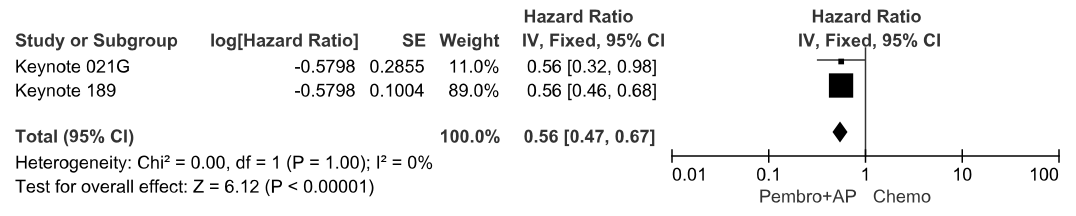


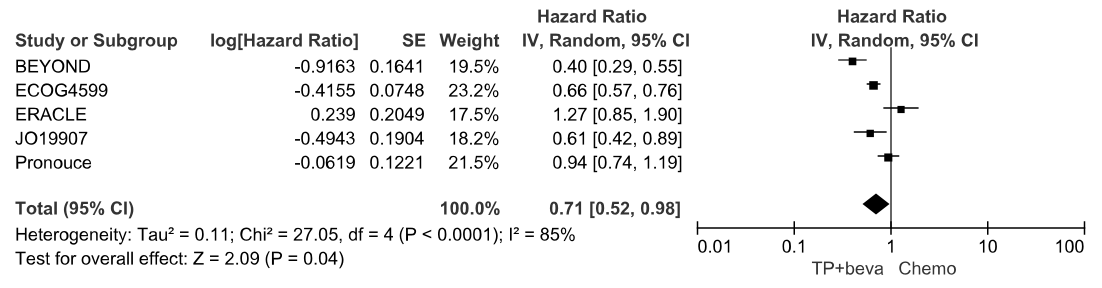


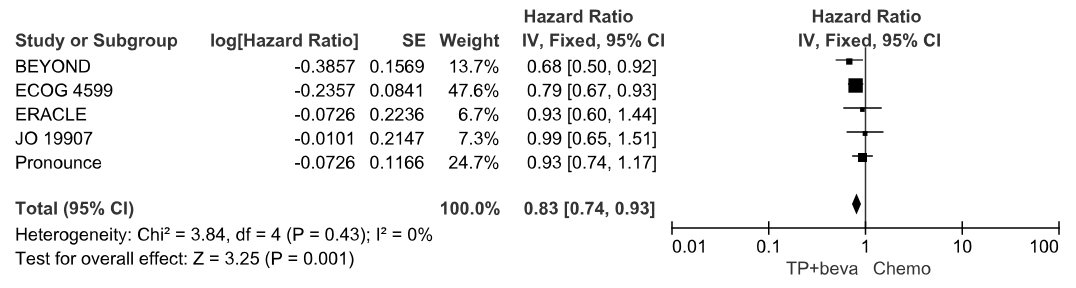


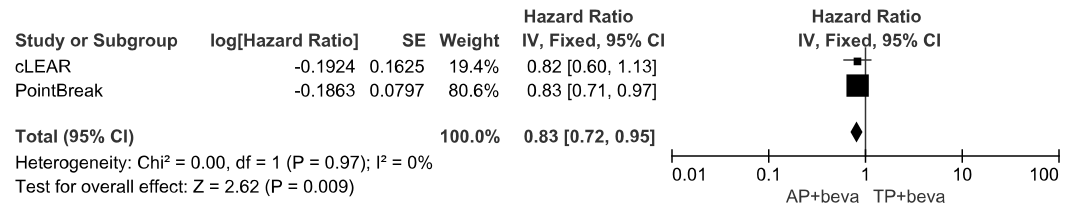


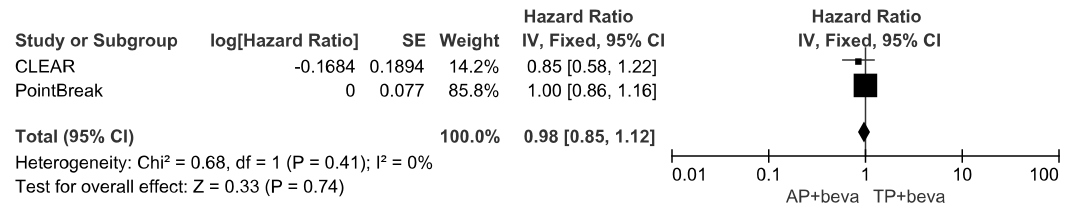


**FigureS2:** Network meta-analysis of progression-free survival in random effect model and included IMpower150.

**(A)** Network meta-analysis of progression-free survival in random effect model

| **Chemo** | **1.37**  **（1.07-1.77）** | **1.25**  **(0.91-1.77）** | **1.08**  **（0.80-1.49)** | **1.18**  **（0.99-1.38）** | **1.21**  **（0.83-1.73）** | **1.27**  **（0.93-1.75）** | **1.22（0.79-1.72）** | **1.19**  **(0.82-1.87)** |
| --- | --- | --- | --- | --- | --- | --- | --- | --- |
|  | **Pembro + AP** | **0.92**  **（0.62-1.45)** | **0.79**  **(0.54-1.20)** | **0.87**  **（0.63-1.18）** | **0.89**  **（0.56-1.37）** | **0.94**  **（0.61-1.43）** | **0.90**  **（0.52-1.37)** | **0.88**  **(0.82-1.87)** |
|  | **Atezo +AP** | **0.86**  **(0.55-1.39)** | **0.94**  **（0.61-1.38）** | **0.97**  **（0.57-1.62）** | **1.02**  **（0.63-1.70）** | **0.98**  **(0.55-1.63)** | **0.96**  **(0.57-1.71)** |
|  | **GP+ Bev** | **1.10**  **（0.74-1.6）** | **1.12**  **（0.66-1.82）** | **1.19**  **（0.73-1.94）** | **1.13**  **(0.63-1.84)** | **1.11**  **(0.67-1.99 )** |
|  | | **TP+Bev** | **1.03**  **（0.68-1.57）** | **1.09**  **（0.84-1.45）** | **1.04**  **(0.68-1.53)** | **1.02**  **(0.68-1.66)** |
|  |  | | **Atezo +TP** | **1.05**  **（0.63-1.74）** | **1.01**  **(0.56-1.65)** | **0.99**  **(0.60-1.68)** |
|  |  | | **AP+ Bev** | **0.96**  **(0.58-1.51)** | **0.94**  **(0.60-1.61）** |
|  |  | | **Camre+AP** | **0.97**  **（0.58-1.73）** |
|  |  | | **Nivo+AP** |

B. Network meta-analysis of progression-free survival excluded IMpower150 in fixed effect model.

| Chemo | 1.37  （1.27-1.48） | 1.25  (1.15-1.35) | 1.07  (1.01-1.14) | 1.18  (1.13-1.23) | **1.21**  **(1.12-1.31)** | **1.28**  **(1.19-1.37)** | 1.23  (1.10-1.39) | 1.19  （1.10-1.28） |
| --- | --- | --- | --- | --- | --- | --- | --- | --- |
|  | Pembro+AP | 0.91  (0.82-1.01) | 0.78  (0.71-0.86) | **0.86**  **(0.79-0.94)** | **0.88**  **(0.79-0.98)** | 0.93  (0.84-1.03) | 0.90  (0.78-1.03) | 0.86  （0.78-0.96） |
|  | Atezo+AP | 0.86  (0.78-0.95) | **0.95**  **(0.87-1.04)** | **0.97**  **(0.87-1.08)** | 1.03  (0.92-1.14) | 0.99  （0.86-1.14） | 0.95  （0.85-1.06） |
|  | GP+ Bev | **1.10**  **(1.02-1.19)** | **1.13**  **(1.02-1.24)** | **1.19**  **(1.09-1.31)** | 1.15  （1.01-1.31） | 1.11  （1.00-1.22） |
|  | | TP+Bev | **1.02**  **(0.94-1.12)** | 1.08  （1.03-1.14） | 1.05  (0.92-1.19) | 1.00  （0.92-1.10） |
|  |  | | Atezo+TP | **1.06**  **（0.95-1.17）** | **1.02**  **(0.88-1.17)** | **0.98**  **（0.88-1.09）** |
|  |  | | AP+Bev | 0.96  (0.84-1.11) | 0.93  (0.83-1.03) |
|  |  | | Camre+AP | 0.96  (0.83-1.11) |
|  |  | | Nivo+AP |
|  | | | |

**Figure S3:** Subgroup analysis of overall survival and progression-free survival for specific regimens. CI, confidence interval; HR, hazard ratio; ECOG-PS, Eastern Cooperative Oncology Group performance

status;

A.

**O****verall survival(<65)**

**Overall survival(female)**

| **Chemo** | **0.69**  **(0.59-0.81)** | 0.95  (0.83-1.09) | 1.03  (0.94-1.14) | **0.87**  **(0.81-0.93)** | 0.90  (0.79-1.03) | **0.88**  **(0.80-0.98)** | 0.90  (0.79-1.03) |
| --- | --- | --- | --- | --- | --- | --- | --- |
| **0.82**  **(0.69-0.98)** | **Pembro+AP** | **1.37**  **(1.12-1.69)** | **1.49**  **(1.24- 1.80)** | **1.29**  **(1.09-1.52)** | **1.21**  **(1.01 -1.44)** | **1.31**  **(1.09-1.58)** | **1.30**  **(1.06-1.60)** |
| **0.86**  **(0.74-1.00)** | 1.05  (0.83-1.32) | **Atezo+AP** | 1.09  (0.92-1.28) | 0.94  (0.81-1.09) | 0.88  (0.75-1.04) | 0.96  (0.81-1.13) | 0.95  (0.78-1.15) |
| 0.94  (0.82-1.09) | 1.15  (0.91-1.43) | 1.09  (0.89-1.35) | **GP+Bev** | **0.86**  **(0.77-0.97)** | **0.81**  **(0.71-0.93)** | **0.88**  **(0.77-1.01)** | 0.87  (0.74-1.03) |
| 0.99  (0.91-1.07) | 1.2  (0.99-1.45) | 1.15  (0.96-1.37) | 1.05  (0.89-1.24) | **TP+Bev** | 0.94  (0.86-1.02) | 1.02  (0.94-1.10) | 1.01  (0.87-1.18) |
| 0.90  (0.79-1.02) | 1.09  (0.88-1.35) | 1.04  (0.85-1.27) | 0.95  (0.79-1.16) | 0.91  (0.78-1.06) | **Atezo+TP** | 0.97  (0.83-1.16) | 1.00  (0.83-1.21) |
| 0.94  (0.81-1.09) | 1.15  (0.91-1.44) | 1.10  (0.89-1.36) | 1.00  (0.82-1.23) | 0.96  (0.84-1.08) | 1.05  (0.86-1.28) | **AP+Bev** | 1.02  (0.87-1.21) |
| — | — | — | — | — | — | — | **Nivo+AP** |

| **Chemo** | **0.76**  **(0.66-0.87)** | 1.0  (0.90-1.11) | **0.90**  **(0.84-0.95)** | **0.86**  **(0.79-0.93)** | 0.93  (0.84-1.04) | 0.98  (0.87-1.10) |
| --- | --- | --- | --- | --- | --- | --- |
| **0.70**  **(0.57-0.85)** | **Pembro+AP** | **1.32**  **(1.11-1.56)** | **1.18**  **(1.02-1.37)** | 1.13  (0.96-1.32) | **1.23**  **(1.04-1.46)** | **1.29**  **(1.08-1.54)** |
| 1.01  (0.89-1.15) | **1.45**  **(1.14-1.84)** | **GP+Bev** | 0.90  (0.80-1.01) | **0.86**  **(0.75-0.97)** | 0.93  (0.81-1.08) | 0.98  (0.84-1.15) |
| 0.97  (0.89-1.05) | **1.38**  **(1.11 -1.72)** | 0.95  (0.82-1.11) | **TC+Bev** | 0.96  (0.88-1.04) | 1.04  (0.96-1.13) | 1.09  (0.95-1.25) |
| 0.91  (0.81-1.03) | **1.31**  **(1.04-1.65)** | 0.90  (0.76-1.07) | 0.95  (0.85-1.06) | **Atezo+TP** | **1.22**  **(1.04-1.42)** | 1.14  (0.99-1.33) |
| 0.91  (0.80-1.04) | **1.30**  **(1.02-1.65)** | 0.90  (0.75-1.08) | 0.94  (0.85-1.04) | 0.995  (0.86-1.16) | **AP+Bev** | 1.05  (0.89-1.23) |
| 0.91  (0.75-1.11) | 1.30  (0.98-1.72) | 0.90  (0.71-1.14) | 0.94  (0.76-1.17) | 0.997  (0.79-1.25) | 1.04  (0.82-1.32) | **Nivo+AP** |

**
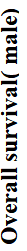
**

**
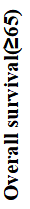
**

Pooled estimates of subgroup analyses (patients stratified according age, sex, performance status, smoking status and with liver metastasis). Data in each cell are hazard ratios (95% credible interval) for the comparison of row-defining treatment versus column-defining treatment. Hazard ratios less than 1 favours row-defining treatment. Significant results are in bold.

**Overall survival(current or former smoking)**

**Overall survival(ECOG1)**

| **Chemo** | **0.76**  **(0.66-0.87)** | 1.0  (0.90-1.11) | **0.90**  **(0.84-0.95)** | **0.86**  **(0.79-0.93)** | 0.93  (0.84-1.04) | 0.98  (0.87-1.10) |
| --- | --- | --- | --- | --- | --- | --- |
| **0.70**  **(0.57-0.85)** | **Pembro+AP** | **1.32**  **(1.11-1.56)** | **1.18**  **(1.02-1.37)** | 1.13  (0.96-1.32) | **1.23**  **(1.04-1.46)** | **1.29**  **(1.08-1.54)** |
| 1.01  (0.89-1.15) | **1.45**  **(1.14-1.84)** | **GP+Bev** | 0.90  (0.80-1.01) | **0.86**  **(0.75-0.97)** | 0.93  (0.81-1.08) | 0.98  (0.84-1.15) |
| 0.97  (0.89-1.05) | **1.38**  **(1.11 -1.72)** | 0.95  (0.82-1.11) | **TP+Bev** | 0.96  (0.88-1.04) | 1.04  (0.96-1.13) | 1.09  (0.95-1.25) |
| 0.91  (0.81-1.03) | **1.31**  **(1.04-1.65)** | 0.90  (0.76-1.07) | 0.95  (0.85-1.06) | **Atezo+TP** | **1.22**  **(1.04-1.42)** | 1.14  (0.99-1.33) |
| 0.91  (0.80-1.04) | **1.30**  **(1.02-1.65)** | 0.90  (0.75-1.08) | 0.94  (0.85-1.04) | 0.995  (0.86-1.16) | **AP+Bev** | 1.05  (0.89-1.23) |
| 0.91  (0.75-1.11) | 1.30  (0.98-1.72) | 0.90  (0.71-1.14) | 0.94  (0.76-1.17) | 0.997  (0.79-1.25) | 1.04  (0.82-1.32) | **Nivo+AP** |


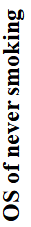


| **Chemo** | **0.77**  **(0.72-0.81)** | **0.92**  **(0.87-0.97)** | — | **0.95(0.91-0.98）** | **0.89**  **（0.86-0.93）** | 0.96  (0.91-1.01) | **0.88**  **（0.84-0.93)** |
| --- | --- | --- | --- | --- | --- | --- | --- |
| **0.53**  **(0.37-0.77)** | **Pembro+AP** | **1.21**  **(1.11-1.31)** | — | **1.24**  **(1.15-1.33）** | **1.17**  **（1.09-1.25）** | **1.25**  **(1.16-1.35)** | **1.15**  **（1.07-1.25)** |
| 0.83  (0.61-1.13) | 1.58  (0.98-2.53) | **Atezo+AP** | — | 1.03  (0.96-1.10) | 0.97  （0.91-1.03) | 1.04  (0.96-1.12) | 0.96  (0.89-1.03) |
| 0.92  (0.77-1.10) | **1.75**  **(1.17-2.63)** | 1.11  (0.78-1.58) | **GP+Bev** | — | — | — | — |
| **0.81**  **(0.68-0.95)** | **1.53**  **(1.03-2.28)** | 0.97  (0.69-1.38) | 0.88  (0.69-1.12) | **TP+Bev** | **0.94**  **(0.90-0.98)** | 1.01  (0.97-1.05) | **0.93**  **(0.88-0.99)** |
| **0.79**  **(0.64-0.97)** | 1.50  (0.99-2.28) | 0.95  (0.66-1.38) | 0.85  (0.65-1.12) | 0.98  (0.83-1.16) | **Atezo+TP** | **1.07**  **(1.02-1.13)** | 0.99  (0.93-1.06) |
| **0.70**  **(0.53-0.93)** | 1.33  (0.84-2.10) | 084  (0.56-1.28) | 0.76  (0.55-1.06) | 0.87  (0.69-1.09) | 0.89  (0.67-1.18) | **AP+Bev** | **0.92**  **(0.86-0.99)** |
| 1.09  (0.87-1.37) | **2.07**  **(1.35-3.17)** | 1.32.  (0.90-1.92) | 1.18  (0.89-1.59) | **1.35**  **(1.02-1.79)** | **1.39**  **(1.02-1.89)** | **1.56**  **(1.09-2.24)** | **Nivo+AP** |

| **Chemo** |  | | | | |
| --- | --- | --- | --- | --- | --- |
| **0.81**  **(0.66-0.99)** | **Pembro+AP** |  | | | |
| 1.00  (0.78-1.26) | 1.22  (0.90-1.67) | **Atezo+AP** |  | | |
| 0.89  (0.78-1.02) | 1.09  (0.86-1.39) | 0.89  (0.68-1.18) | **TC+Bev** |  | |
| 0.91  (0.77-1.07) | 1.12  (0.87-1.45) | 0.91  (0.69-1.22) | 1.03  (0.87-1.20) | **Atezo+TP** |  |
| 0.91  (0.76-1.09) | 1.12  (0.86-1.47) | 0.91  (0.68- 1.23) | 1.03  (0.82-1.28) | 1.00  (0.78-1.27) | **Nivo+AP** |


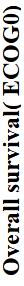


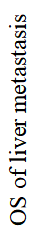


| **Chemo** | **1.44**  **(1.28- 1.63)** | **1.22**  **(1.1-1.36)** | **1.07**  **(0.97-1.18)** | **1.30**  **(1.19-1.43）** | **1.21**  **(1.09- 1.35）** | **1.44**  **(1.28- 1.62）** | **1.22**  **(1.06-1.41)** |
| --- | --- | --- | --- | --- | --- | --- | --- |
| 1.13  (0.99-1.30) | **Pembro+AP** | **0.85**  **(0.72-1.00)** | **0.74**  **(0.63-0.87)** | 0.9  (0.78-1.05) | **0.84**  **(0.72-0.99)** | 1.00  (0.84-1.18) | 0.85  (0.70-1.03) |
| **1.30**  **(1.15-1.46)** | 1.15  (0.96-1.37) | **Atezo+AP** | 0.87  (0.76-1.01) | 1.7  (0.93-1.23) | 0.99  (0.85-1.15) | **1.18**  **(1.00-1.38)** | 1.00  (0.84-1.19) |
| 1.14  (0.98-1.33) | 1.01  (0.82-1.24) | 0.8  (0.72-1.07) | **GP+Bev** | **1.22**  **（1.06-1.4）** | 1.14  (0.98-1.32) | **1.35**  **(1.15- 1.57)** | 1.15  (0.96-1.36) |
| **1.15**  **(1.02-1.29)** | 1.01  (0.85-1.21) | 0.88  (0.75-1.04) | 1.01  (0.83-1.22) | **TP+Bev** | 0.93  (0.81-1.08) | **1.10**  **(1.03-1.19)** | 0.94  (0.79-1.11) |
| **1.21**  **(1.09-1.35)** | 1.07  (0.90-1.27) | 0.94  (0.80-1.10) | 1.07  (0.89-1.29) | 1.06  (0.90-1.24) | **Atezo+TP** | **1.18**  **(1.01-1.39)** | 1.01  (0.84-1.20) |
| **1.22**  **(1.05-1.43)** | 1.08  (0.88-1.32) | 0.94  (0.77-1.15) | 1.07  (0.86-1.34) | 1.07  (0.96-1.18) | 1.01  (0.83-1.22) | **AP+Bev** | 0.85  (0.71-1.02) |
| 1.26  (0.98-1.63) | 1.11  (0.84-1.48) | 0.97  (0.73-1.29) | 1.11  (0.82- 1.49) | 1.10  (0.83-1.46) | 1.04  (0.79-1.37) | 1.03  (0.76-1.39) | **Camre+AP** |


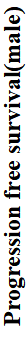


| **Chemo** | **1.29**  **(1.15-1.44)** | **1.08**  **(0.99-1.18)** | **1.21**  **(1.10-1.32)** | **1.18**  **(1.07-1.31)** | **1.27**  **(1.14-1.41)** | **1.21**  **(1.06-1.38)** |
| --- | --- | --- | --- | --- | --- | --- |
| **1.36**  **(1.18-1.58)** | **Pembro+AP** | **0.84**  **(0.73-0.97)** | 0.94  (0.81-1.08) | 0.92  (0.79-1.07) | 0.98  (0.84-1.15) | 0.94  (0.79-1.11) |
| 1.12  (0.98-1.28) | 0.82  (0.67-1.00) | **GP+Bev** | 1.11  (0.98-1.26) | 1.09  (0.96-1.24) | **1.17**  **(1.02-1.34)** | 1.11  (0.95-1.30) |
| **1.25**  **(1.12-1.40)** | 0.92  (0.76-1.10) | 1.12  (0.94-1.33) | **TP+Bev** | 0.98  (0.85-1.12) | 1.05  (0.99-1.11) | 0.9995  (0.85-1.17) |
| **1.26**  **(1.11-1.42)** | 0.92  (0.76-1.12) | 1.12  (0.93-1.34) | 1.00  (0.85-1.19) | **Atezo+TP** | 1.07  (0.92-1.24) | 1.02  (0.86-1.21) |
| **1.41**  **(1.21-1.62)** | 1.03  (0.84-1.26) | **1.25**  **(1.03- 1.53)** | **1.12**  **(1.03-1.23)** | 1.12  (0.92-1.35) | **AP+Bev** | 0.95  (0.80-1.13) |
| **1.39**  **(1.05-1.83)** | 1.02  (0.74-1.39) | 1.24  (0.91-1.69) | 1.11  (0.82-1.50) | 1.10  (0.81-1.50) | 0.99  (0.72-1.35) | **Camre+AP** |

| **Chemo** | **1.49**  **(1.30-1.70)** | **1.27**  **(1.10-1.46)** | **1.17**  **(1.04-1.30)** | **1.26**  **(1.11-1.42)** | **1.30**  **(1.12-1.49)** | 1.11  (0.96-1.29) |
| --- | --- | --- | --- | --- | --- | --- |
| **1.20**  **(1.06-1.35)** | **Pembro+AP** | 0.85  (0.70-1.04) | **0.78**  **(0.65-0.93)** | 0.84  (0.70-1.01) | 0.87  (0.72-1.06) | **0.75**  **(0.61-0.91)** |
| **1.01**  **(0.91-1.12)** | **0.85**  **(0.72-0.99)** | **GP+Bev** | 0.92  (0.77-1.10) | 0.99  (0.82-1.19) | 1.02  (0.84-1.25) | 0.88  (0.72-1.08) |
| **1.15**  **(1.05-1.26)** | 0.96  (0.82-1.12) | 1.14  (0.99-1.30) | **TP+Bev** | 1.08  (0.92-1.27) | **1.11**  **(1.02-1.21)** | 0.96  (0.79-1.15) |
| **1.19**  **(1.09-1.31)** | 0.99  (0.85-1.16) | **1.17**  **(1.02-1.35)** | 1.04  (0.91-1.18) | **Atezo+TP** | 1.03  (0.85-1.24) | 0.89  (0.73-1.07) |
| **1.22**  **(1.08-1.38)** | 1.02  (0.86-1.21) | 1.21  (1.03-1.42) | 1.06  (0.99-1.15) | 1.03  (0.88-1.20) | **AP+Bev** | 0.86  (0.70-1.05) |
| **1.29**  **(1.11-1.49)** | 1.07  (0.89-1.29) | 1.27  (1.07- 1.51) | 1.12  (0.95-1.32) | 1.08  (0.91-1.29) | 1.05  (0.87-1.26) | **Camre+AP** |

| **Chemo** | **1.31**  **(1.19- 1.43)** | **1.24**  **(1.14-1.35)** | **1.09**  **(1.01-1.18)** | **—** | **1.21**  **(1.12-1.32)** | **1.15**  **(1.03-1.27)** |
| --- | --- | --- | --- | --- | --- | --- |
| **1.44**  **(1.10-1.90)** | **Pembro+AP** | 0.95  (0.84-1.08) | **0.83**  **(0.74-0.94)** | — | 0.93  (0.82-1.05) | 0.88  (0.76-1.01) |
| **1.36**  **(1.07-1.75)** | 0.94  (0.65-1.36) | **Atezo+AP** | **0.88**  **(0.78-0.99)** | — | 0.98  (0.87-1.10) | 0.92  (0.81-1.06) |
| **1.07**  **(0.91-1.26)** | 0.74  (0.54-1.02) | 0.79  (0.59-1.06) | **GP+Bev** | — | — | — |
| **1.48**  **(1.26-1.72)** | 1.02  (0.75-1.40) | 1.08  (0.81-1.45) | **1.37**  **(1.10- 1.72)** | **TP+Bev** | 1.12  (0.99-1.25) | 1.05  (0.98-1.13) |
| 1.22  (0.95-1.57) | 0.84  (0.58-1.23) | 0.90  (0.63-1.28) | 1.14  (0.84-1.54) | 0.83  (0.62-1.11) | **Atezo+TP** | 0.94  (0.83-1.08) |
| **1.91**  **(1.50-2.42)** | 1.32  (0.92-1.90) | 1.40  (0.99-1.98) | **1.78**  **(1.33-2.37)** | **1.29**  **(1.08-1.56)** | **1.56**  **(1.10-2.20)** | **AP+Bev** |

**Progression free survival(<65)**

<65

**Progression free survival(female)**


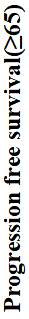


**Progression free survival(ECOG 1)**


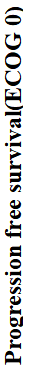


**Progression free survival(current or former smoking)**


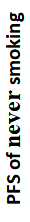


B.

**Table S1:** Quality assessment: risk of bias according to Cochrane Collaboration’s tool

**
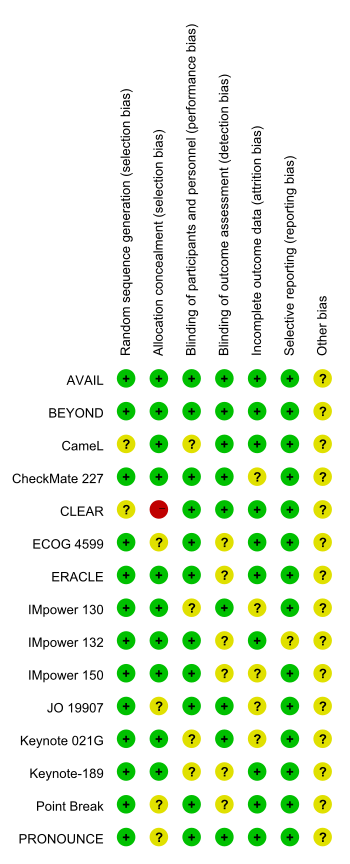
**


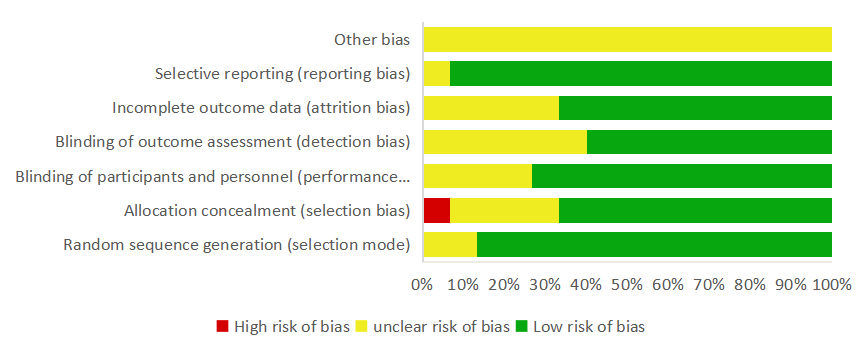


**Table S2:** Comparisons of the fit of consistency and inconsistency models using deviance information criteria (DIC).

Consistency for overall survival and Progression-free survival

|  |  | Overall | |  |
| --- | --- | --- | --- | --- |
| Model |  | Overall survival |  | Progression-free survival |
| Consistency |  | -36.0 |  | -22.59 |
| Inconsistency |  | -34.33 |  | -31.66 |

**Consistency of objective response rate**

Consistency of treatment related aevere adverse events

|  | **Parameter** |  | **Median**  **(95% CrI)** |
| --- | --- | --- | --- |
| consistency model | Random Effects Standard Deviation |  | 1.24 (0.68, 2.19) |
| inconsistency model | Random Effects Standard Deviation |  | 1.25 (0.70, 2.19) |

|  | **Parameter** | **Median (95% CrI)** |
| --- | --- | --- |
| consistency model | Random Effects Standard Deviation | 0.31 (0.03, 0.81) |
| inconsistency model | Random Effects Standard Deviation | 0.34 (0.08, 0.86) |
| Inconsistency Standard Deviation | 0.48 (0.02, 1.26) |

Table S3:Heterogeneity analysis of direct and indirect outcomes.

|  | PFS | | | OS | |
| --- | --- | --- | --- | --- | --- |
| direct effect | indirect effect  （fixed model） | indirect effect  （random model） | direct effect | indirect effect |
| Pembro+AP vs Chemo | 0.49(0.42-0.58) | 0.73(0.68-0.78) | 0.73(0.56-0.93) | 0.56(0.47-0.67) | 0.78(0.72-0.84) |
| TP+Bev vs Chemo | 0.70(0.63-0.78) | 0.85(0.81-0.88) | 0.92(0.69-1.19) | 0.83(0.74-0.93) | 0.93(0.89-0.97) |
| AP+Bev vs TP+Bev | 0.83(0.71-0.97) | 0.93(0.88-0.97) | 0.80(0.56-1.10) | 0.98(0.85-1.12) | 0.99(0.93-1.05) |
| Atezo+AP vs Chemo | 0.60 (0.49–0.72) | 0.80(0.74-0.87) | 0.93(0.67-1.25) | 0.81 (0.64-1.03) | 0.91(0.82-1.01) |
| GP+Bev vs Chemo | 0.85(0.73-1.00) | 0.93(0.88-1.00） | 0.83(0.58-1.20) | 1.03(0.86-1.23） | 1.01(0.94-1.10) |
| Atezo+TP vs Chemo | 0.64(0.54-0.77) | 0.82(0.78-0.86） | 0.82(0.58-1.27) | 0.79(0.64–0.98) | 0.88(0.82-0.94) |
| Camre+AP vs Chemo | 0.61(0.46-0.80） | 0.81(0.72-0.91） | 0.84(0.53-1.22) | 0.72 (0.52‒1.01) | 0.87(0.75-1.00) |
| Nivo+AP vs Chemo | 0.67 (0.55-0.82) | 0.84(0.78-0.91) | 0.84(0.53-1.22) | 0.84(0.71–1.00) | 0.94(0.85-1.03） |
| Atezo+TP vs TP+Bev | 0.91(0.78-1.06) | 0.96(0.92-1.01) | 0.97(0.64-1.47） | 0.84(0.71–1.00) | 0.92(0.71-1.19） |

**Table S4: Rank probability of progression-free survival for specific regimens excluded IMpower150 study.**

| PFS in whole population for specific regimens | | | | | | | | | |
| --- | --- | --- | --- | --- | --- | --- | --- | --- | --- |
| Treatment | Rank of possibility (%) | | | | | | | | |
| 1 | 2 | 3 | 4 | 5 | 6 | 7 | 8 | 9 |
| Chemo | 0.0 | 0.0 | 0.0 | 0.0 | 0.0 | 0.0 | 0.0 | 1.0 | **99.0** |
| Pembro+AP | **83.4** | 12.7 | 3.0 | 0.7 | 0.1 | 0.0 | 0.0 | 0.0 | 0.0 |
| Atezo+AP | 2.9 | 19.0 | 27.8 | **23.6** | 14.5 | 8.0 | 4.3 | 0.1 | 0.0 |
| GP+Bev | 0.0 | 0.0 | 0.0 | 0.0 | 0.1 | 0.4 | 4.7 | **93.7** | 1.1 |
| TC+Bev | 0.0 | 0.0 | 1.6 | 8.3 | 22.8 | **36.5** | 30.4 | 0.3 | 0.0 |
| Atezo+TC | 0.6 | 5.8 | 14.1 | 21.2 | **23.1** | 18.9 | 15.7 | 0.8 | 0.0 |
| AP+Bev | 7.3 | **41.8** | **28.6** | 14.7 | 5.8 | 1.7 | 0.1 | 0.0 | 0.0 |
| Camre+AP | 5.5 | 18.0 | 18.5 | 17.4 | 13.5 | 11.5 | 13.6 | 2.0 | 0.0 |
| Nivo+AP | 0.2 | 2.3 | 7.0 | 13.7 | 19.9 | 23.6 | **31.0** | 2.2 | 0.0 |

**Table S5:** Bayesian ranking results of network meta-analysis of different treatment models in whole population.

| PFS in whole population | | | |  | OS in whole population | | | |
| --- | --- | --- | --- | --- | --- | --- | --- | --- |
| Treatment | Rank of possibility (%) | | |  | Treatment | Rank of possibility (%) | | |
| 1 | 2 | 3 |  | 1 | 2 | 3 |
| Chemo | 0.0 | 0.0 | **100.0** |  | Chemo | 0.0 | 0.2 | **99.8** |
| Chemo+ICIs | **100.0** | 1.0 | 0.0 |  | Chemo+ICIs | **100.0** | 0.0 | 0.0 |
| Chemo+Bev | 0.0 | **100.0** | 0.0 |  | Chemo+Bev | 0.3 | **99.2** | 0.6 |

**Table S6:** Bayesian ranking results of network meta-analysis of different treatment models in subgroups.

A

| PFS for < 65 years | | | |  | PFS for ≧ 65 years | | | |  | PFS for male | | | |  | PFS for female | | | |
| --- | --- | --- | --- | --- | --- | --- | --- | --- | --- | --- | --- | --- | --- | --- | --- | --- | --- | --- |
| Treatment | Rank of possibility (%) | | |  | Treatment | Rank of possibility (%) | | |  | Treatment | Rank of possibility (%) | | |  | Treatment | Rank of possibility (%) | | |
| 1 | 2 | 3 |  | 1 | 2 | 3 |  | 1 | 2 | 3 |  | 1 | 2 | 3 |
| Chemo | 0.0 | 0.0 | **100.0** |  | Chemo | 0.0 | 7.0 | **93.0** |  | Chemo | 0.0 | 0.8 | **99.2** |  | Chemo | 0.0 | 0.0 | **100.0** |
| Chemo+ICIs | **91.3** | 8.7 | 0.0 |  | Chemo+ICIs | **98.7** | 1.3 | 0.0 |  | Chemo+ICIs | **98.7** | 1.3 | 0.0 |  | Chemo+ICIs | **86.4** | 13.7 | 0.0 |
| Chemo+Bev | 10.0 | **91.3** | 0.0 |  | Chemo+Bev | 1.5 | **91.7** | 6.9 |  | Chemo+Bev | 1.3 | **97.9** | 0.8 |  | Chemo+Bev | 13.7 | **86.3** | 0.0 |
|  |  |  |  |  |  |  |  |  |  |  |  |  |  |  |  |  |  |  |
| PFS for ECOG0 | | | |  | PFS for ECOG1 | | | |  | PFS for current or former smoking | | | |  | PFS for never smoking | | | |
| Treatment | Rank of possibility (%) | | |  | Treatment | Rank of possibility (%) | | |  | Treatment | Rank of possibility (%) | | |  | Treatment | Rank of possibility (%) | | |
| 1 | 2 | 3 |  | 1 | 2 | 3 |  | 1 | 2 | 3 |  | 1 | 2 | 3 |
| Chemo | 0.0 | 1.5 | **98.5** |  | Chemo | 0.0 | 0.0 | **100.0** |  | Chemo | 0.0 | 2.1 | **97.9** |  | Chemo | 0.0 | 0.0 | **100.0** |
| Chemo+ICIs | **99.7** | 0.3 | 0.0 |  | Chemo+ICIs | **94.5** | 5.5 | 0.0 |  | Chemo+ICIs | **99.8** | 0.2 | 0.0 |  | Chemo+ICIs | **69.9** | 30.1 | 0.0 |
| Chemo+Bev | 0.3 | **98.3** | 1.4 |  | Chemo+Bev | 5.6 | **94.4** | 0.0 |  | Chemo+Bev | 0.2 | **97.7** | 2.1 |  | Chemo+Bev | 30.3 | **69.7** | 0.0 |

| OS for < 65 years  B. | | | |  | OS for ≧ 65 years | | | |  | OS for male | | | |  | OS for female | | | |
| --- | --- | --- | --- | --- | --- | --- | --- | --- | --- | --- | --- | --- | --- | --- | --- | --- | --- | --- |
| Treatment | Rank of possibility (%) | | |  | Treatment | Rank of possibility (%) | | |  | Treatment | Rank of possibility (%) | | |  | Treatment | Rank of possibility (%) | | |
| 1 | 2 | 3 |  | 1 | 2 | 3 |  | 1 | 2 | 3 |  | 1 | 2 | 3 |
| Chemo | 0.0 | 0.4 | **99.6** |  | Chemo | 0.0 | 49.5 | **50.5** |  | Chemo | 0.0 | 1.0 | **99.0** |  | Chemo | 0.0 | 0.6 | **99.4** |
| Chemo+ICIs | **99.2** | 0.8 | 0.0 |  | Chemo+ICIs | **98.4** | 1.5 | 0.0 |  | Chemo+ICIs | **90.2** | 9.8 | 0.0 |  | Chemo+ICIs | **99.9** | 0.1 | 0.0 |
| Chemo+Bev | 0.9 | **98.7** | 0.4 |  | Chemo+Bev | 1.6 | **49.6** | 48.8 |  | Chemo+Bev | 9.8 | **89.1** | 1.1 |  | Chemo+Bev | 0.1 | **99.2** | 0.8 |
|  |  |  |  |  |  |  |  |  |  |  |  |  |  |  |  |  |  |  |
| OS for ECOG0 | | | |  | OS for ECOG1 | | | |  | OS for current or former smoking | | | |  | OS for never smoking | | | |
| Treatment | Rank of possibility (%) | | |  | Treatment | Rank of possibility (%) | | |  | Treatment | Rank of possibility (%) | | |  | Treatment | Rank of possibility (%) | | |
| 1 | 2 | 3 |  | 1 | 2 | 3 |  | 1 | 2 | 3 |  | 1 | 2 | 3 |
| Chemo | 0.1 | 18.4 | **81.6** |  | Chemo | 1.6 | 80.2 | **18.2** |  | Chemo | 0.0 | 0.0 | **100.0** |  | Chemo | 0.0 | 2.5 | **97.5** |
| Chemo+ICIs | **98.4** | 1.5 | 0.1 |  | Chemo+ICIs | **94.8** | 5.2 | 0.0 |  | Chemo+ICIs | **100.0** | 0.0 | 0.0 |  | Chemo+ICIs | **97.9** | 2.0 | 0.1 |
| Chemo+Bev | 1.6 | **80.2** | 18.2 |  | Chemo+Bev | 5.1 | **94.8** | 0.1 |  | Chemo+Bev | 0.0 | **43.5** | 56.5 |  | Chemo+Bev | 2.1 | **95.5** | 2.4 |
|  |  |  |  |  |  |  |  |  |  |  |  |  |  |  |  |  |  |  |
| OS for liver metastasis | | | |  |  |  |  |  |  |  |  |  |  |  |  |  |  |  |
| Treatment | Rank of possibility (%) | | |  |  |  |  |  |  |  |  |  |  |  |  |  |  |  |
| 1 | 2 | 3 |  |  |  |  |  |  |  |  |  |  |  |  |  |  |  |
| Chemo | 0.2 | 4.2 | **96.0** |  |  |  |  |  |  |  |  |  |  |  |  |  |  |  |
| Chemo+ICIs | 40.1 | **58.4** | 1.4 |  |  |  |  |  |  |  |  |  |  |  |  |  |  |  |
| Chemo+Bev | **59.8** | 37.7 | 2.6 |  |  |  |  |  |  |  |  |  |  |  |  |  |  |  |

1. Ranking results of Progression-free survival. B. Ranking results of Overall survival.

The number in each cell represents the posterior probability of the row-defining treatment being ranked at the column.defining position. The numbers with biggest probability of ranking first and last are in bold and underscored.

**Table S7:** Rank probability of overall survival, progression-free survival,objective response rate and 3-5 grade treatment related adverse events for specific regimens in whole population.

| Progression free survival in whole population | | | | | | | | | |
| --- | --- | --- | --- | --- | --- | --- | --- | --- | --- |
| Treatment | Rank of possibility (%) | | | | | | | | |
|  | 1 | 2 | 3 | 4 | 5 | 6 | 7 | 8 | 9 |
| Chemo | 0.0 | 0.0 | 0.0 | 0.0 | 0.0 | 0.0 | 0.0 | 1.0 | **99.0** |
| Pembro+AP | **85.0** | 11.6 | 2.6 | 0.6 | 0.1 | 0.0 | 0.0 | 0.0 | 0.0 |
| Atezo+AP | 2.9 | 20.4 | 26.9 | 22.0 | 14.5 | 8.4 | 4.8 | 0.0 | 0.0 |
| GP+Bev | 0.0 | 0.0 | 0.0 | 0.0 | 0.1 | 0.3 | 4.0 | **94.7** | 0.9 |
| TC+Bev | 0.0 | 0.0 | 0.3 | 3.7 | 16.7 | **40.4** | **38.6** | 0.4 | 0.0 |
| Atezo+TP | 0.1 | 3.3 | 16.3 | **30.5** | **31.6** | 14.7 | 3.4 | 0.0 | 0.0 |
| AP+Bev | 6.6 | **41.4** | **29.9** | 15.0 | 5.4 | 1.7 | 0.0 | 0.0 | 0.0 |
| Camre+AP | 6.1 | 19.0 | 17.6 | 16.0 | 13.6 | 11.3 | 14.8 | 1.7 | 0.0 |
| Nivo+AP | 0.2 | 2.7 | 6.9 | 12.3 | 18.8 | 23.3 | 33.8 | 2.1 | 0.0 |

| Overall survival in whole population | | | | | | | | | |
| --- | --- | --- | --- | --- | --- | --- | --- | --- | --- |
| Treatment | Rank of possibility (%) | | | | | | | | |
| 1 | 2 | 3 | 4 | 5 | 6 | 7 | 8 | 9 |
| Chemo | 0.0 | 0.0 | 0.0 | 0.0 | 0.0 | 0.6 | 10.6 | **57.5** | 31.3 |
| Pembro+AP | **88.9** | 10.3 | 0.7 | 0.1 | 0.0 | 0.0 | 0.0 | 0.0 | 0.0 |
| Atezo+AP | 0.7 | 11.8 | 18.4 | 19.4 | 14.2 | 14.9 | 14.5 | 3.9 | 2.1 |
| GP+Bev | 0.7 | 11.8 | 18.4 | 19.4 | 14.2 | 14.9 | 14.5 | 3.9 | 2.1 |
| TP+Bev | 0.0 | 0.1 | 2.2 | 12.9 | **30.9** | **35.7** | **17.1** | 1.0 | 0.0 |
| Atezo+TP | 0.7 | 16.9 | **24.8** | 18.3 | 13.6 | 13.0 | 10.3 | 1.8 | 0.6 |
| AP+Bev | 0.1 | 3.5 | 12.0 | **21.2** | 24.4 | 0.211 | 14.4 | 2.6 | 0.8 |
| Camre+AP | 10.0 | **39.5** | 16.8 | 10.6 | 6.9 | 6.5 | 6.1 | 1.9 | 1.6 |
| Nivo+AP | 0.0 | 0.0 | 0.0 | 0.1 | 0.4 | 1.4 | 6.0 | 14.9 | **77.3** |

| Objective Response Rate in whole population | | | | | | | | | |
| --- | --- | --- | --- | --- | --- | --- | --- | --- | --- |
| Treatment | Rank of possibility (%) | | | | | | | | |
| 1 | 2 | 3 | 4 | 5 | 6 | 7 | 8 | 9 |
| Chemo | 0.0 | 0.0 | 0.0 | 0.0 | 0.0 | 1.0 | 2.0 | 15.0 | **82.0** |
| Pembro+AP | **58.0** | **19.0** | 10.0 | 5.0 | 3.0 | 2.0 | 1.0 | 1.0 | 0.0 |
| Atezo+AP | 4.0 | 7.0 | 8.0 | 8.0 | 10.0 | 15.0 | **21.0** | 21.0 | 5.0 |
| GP+Bev | 3.0 | 5.0 | 6.0 | 7.0 | 9.0 | 13.0 | 20.0 | **31.0** | 7.0 |
| TC+Bev | 1.0 | 7.0 | **20.0** | **26.0** | **24.0** | 14.0 | 6.0 | 1.0 | 0.0 |
| Atezo+TP | 3.0 | 9.0 | 12.0 | 15.0 | 18.0 | **19.0** | 15.0 | 8.0 | 1.0 |
| AP+Bev | 10.0 | **19.0** | 17.0 | 15.0 | 13.0 | 11.0 | 9.0 | 5.0 | 1.0 |
| Camre+AP | 11.0 | 18.0 | 14.0 | 11.0 | 12.0 | 12.0 | 12.0 | 9.0 | 2.0 |
| Nivo+AP | 9.0 | 17.0 | 14.0 | 11.0 | 11.0 | 14.0 | 13.0 | 9.0 | 2.0 |

| Adverse events for in whole population | | | | | | | | | |
| --- | --- | --- | --- | --- | --- | --- | --- | --- | --- |
| Treatment | Rank of possibility (%) | | | | | | | | |
| 1 | 2 | 3 | 4 | 5 | 6 | 7 | 8 | 9 |
| Chemo | 0.0 | 0.0 | 1.0 | 4.0 | 12.0 | **22.0** | **30.0** | **24.0** | 7.0 |
| Pembro+AP | 5.0 | 8.0 | 10.0 | 10.0 | 11.0 | 12.0 | 13.0 | 15.0 | 16.0 |
| Atezo+AP | 18.0 | 13.0 | 11.0 | 10.0 | 9.0 | 9.0 | 8.0 | 9.0 | 13.0 |
| GP+Bev | 12.0 | 11.0 | 9.0 | 9.0 | 9.0 | 9.0 | 9.0 | 12.0 | **19.0** |
| TC+Bev | 5.0 | **16.0** | **22.0** | **22.0** | **17.0** | 11.0 | 5.0 | 2.0 | 1.0 |
| Atezo+TP | 10.0 | 13.0 | 14.0 | 14.0 | 13.0 | 11.0 | 10.0 | 9.0 | 7.0 |
| AP+Bev | 10.0 | 12.0 | 12.0 | 12.0 | 11.0 | 10.0 | 10.0 | 11.0 | 12.0 |
| Camre+AP | **26.0** | **16.0** | 11.0 | 9.0 | 8.0 | 7.0 | 7.0 | 7.0 | 9.0 |
| Nivo+AP | 14.0 | 12.0 | 10.0 | 9.0 | 10.0 | 9.0 | 9.0 | 11.0 | 16.0 |

**Table S8:** Rank probability of overall survival and progression-free survival for specific regimens in subgroups.

A.

| OS for < 65 years subpopulation | | | | | | | | |  | OS for ≧ 65 years subpopulation | | | | | | | |
| --- | --- | --- | --- | --- | --- | --- | --- | --- | --- | --- | --- | --- | --- | --- | --- | --- | --- |
| Treatment | Rank of possibility (%) | | | | | | | |  | Treatment | Rank of possibility (%) | | | | | | |
| 1 | 2 | 3 | 4 | 5 | 6 | 7 | 8 |  | 1 | 2 | 3 | 4 | 5 | 6 | 7 |
| Chemo | 0.0 | 0.0 | 0.0 | 0.1 | 2.7 | 23.6 | **56.6** | 17.0 |  | Chemo | 0.0 | 0.0 | 0.4 | 4.6 | 19.6 | **36.1** | **39.3** |
| Pembro+AP | **98.5** | 1.1 | 0.3 | 0.1 | 0.0 | 0.0 | 0.0 | 0.0 |  | Pembro+AP | **55.2** | 22.7 | 11.7 | 6.0 | 2.5 | 1.1 | 0.8 |
| Atezo+AP | 0.1 | 6.2 | 6.8 | 12.0 | 21.7 | **28.6** | 13.1 | 11.6 |  | Atezo+AP | 27.5 | **32.8** | 19.5 | 11.2 | 5.0 | 2.4 | 1.7 |
| GP+Bev | 0.0 | 0.1 | 0.2 | 0.7 | 3.4 | 10.8 | 19.7 | **65.2** |  | GP+Bev | 4.1 | 10.7 | 18.3 | **23.9** | 16.1 | 11.0 | 15.9 |
| TP+Bev | 0.2 | **31.8** | **39.5** | 21.2 | 6.5 | 0.8 | 0.0 | 0.0 |  | TP+Bev | 0.0 | 0.4 | 2.7 | 11.4 | **26.6** | 34.5 | 24.4 |
| Atezo+TP | 0.5 | 21.0 | 13.4 | 19.7 | 23.3 | 14.7 | 4.5 | 2.8 |  | Atezo+TP | 10.3 | 23.1 | **29.5** | 19.9 | 9.5 | 4.6 | 3.2 |
| AP+Bev | 0.0 | 20.3 | 27.4 | **26.0** | 17.8 | 7.3 | 1.0 | 0.2 |  | AP+Bev | 4.0 | 10.7 | 17.7 | 23.3 | 19.5 | 10.9 | 13.9 |
| Nivo+AP | 0.5 | 21.2 | 13.3 | 19.4 | **23.7** | 14.6 | 4.4 | 2.9 |  |  |  |  |  |  |  |  |  |
|  |  |  |  |  |  |  |  |  |  |  |  |  |  |  |  |  |  |
| OS for male subpopulation | | | | | | | |  |  | OS for female subpopulation | | | | | | | |
| Treatment | Rank of possibility (%) | | | | | | |  |  | Treatment | Rank of possibility (%) | | | | | | |
| 1 | 2 | 3 | 4 | 5 | 6 | 7 |  |  | 1 | 2 | 3 | 4 | 5 | 6 | 7 |
| Chemo | 0.0 | 0.0 | 0.4 | 5.0 | **28.7** | **57.2** | 8.7 |  |  | Chemo | 0.0 | 0.0 | 0.2 | 1.7 | 9.0 | **34.4** | **54.6** |
| Pembro+AP | **63.1** | 14.5 | 9.7 | 7.1 | 3.8 | 1.3 | 0.5 |  |  | Pembro+AP | **99.8** | 0.2 | 0.0 | 0.0 | 0.0 | 0.0 | 0.0 |
| GP+Bev | 0.0 | 0.2 | 0.7 | 2.5 | 6.1 | 13.1 | **77.3** |  |  | GP+Bev | 0.0 | 8.4 | 22.3 | 20.4 | 18.2 | 16.7 | 14.1 |
| TP+Bev | 12.5 | **36.3** | **33.2** | 15.3 | 2.6 | 0.1 | 0.0 |  |  | TP+Bev | 0.0 | 0.3 | 5.0 | 23.1 | **36.8** | 26.8 | 7.9 |
| Atezo+TP | 8.3 | 16.3 | 16.9 | 22.1 | 20.6 | 10.5 | 5.2 |  |  | Atezo+TP | 0.2 | **69.1** | 17.0 | 7.1 | 3.8 | 2.0 | 0.8 |
| AP+Bev | 5.5 | 12.9 | 22.2 | **26.2** | 20.4 | 9.1 | 3.8 |  |  | AP+Bev | 0.0 | 10.8 | **33.3** | **31.1** | 17.6 | 5.3 | 1.9 |
| Nivo+AP | 11.3 | 20.1 | 17.7 | 21.4 | 17.4 | 8.3 | 3.9 |  |  | Nivo+AP | 0.0 | 12.3 | 22.5 | 16.0 | 14.5 | 14.4 | 20.2 |

| OS for ECOG0 subpopulation | | | | | | | |  |  | OS for ECOG1 subpopulation | | | | | | | |
| --- | --- | --- | --- | --- | --- | --- | --- | --- | --- | --- | --- | --- | --- | --- | --- | --- | --- |
| Treatment | Rank of possibility (%) | | | | | | |  |  | Treatment | Rank of possibility (%) | | | | | | |
| 1 | 2 | 3 | 4 | 5 | 6 | 7 |  |  | 1 | 2 | 3 | 4 | 5 | 6 | 7 |
| Chemo | 0.0 | 0.0 | 0.3 | 3.0 | 20.5 | **49.8** | 26.4 |  |  | Chemo | 0.0 | 0.0 | 0.3 | 4.9 | **26.0** | **45.0** | **42.6** |
| Pembro+AP | **93.2** | 5.2 | 1.0 | 0.4 | 0.1 | 0.1 | 0.0 |  |  | Pembro+AP | **95.8** | 3.7 | 0.3 | 0.1 | 0.0 | 0.0 | 0.0 |
| GP+Bev | 0.0 | 1.4 | 3.6 | 7.7 | 15.6 | 23.4 | **48.3** |  |  | GP+Bev | 0.0 | 2.3 | 6.4 | 12.5 | 19.8 | 21.8 | 37.2 |
| TP+Bev | 0.0 | 3.7 | 28.7 | **38.5** | **22.5** | 5.2 | 1.4 |  |  | TP+Bev | 0.2 | 22.4 | **48.2** | 22.9 | 5.5 | 0.8 | 0.1 |
| Atezo+TP | 0.9 | 15.9 | 19.1 | 21.1 | 20.8 | 11.4 | 10.9 |  |  | Atezo+TP | 3.8 | **59.5** | 22.6 | 8.6 | 3.2 | 1.6 | 0.8 |
| AP+Bev | 3.6 | **48.1** | **28.9** | 12.4 | 4.7 | 1.6 | 0.8 |  |  | AP+Bev | 0.2 | 6.5 | 15.4 | **29.9** | 21.8 | 13.3 | 12.9 |
| Nivo+AP | 2.8 | 26.6 | 18.3 | 16.9 | 15.0 | 8.8 | 11.6 |  |  | Nivo+AP | 0.2 | 7.4 | 13.3 | 17.0 | 21.3 | 16.3 | 24.5 |
|  |  |  |  |  |  |  |  |  |  |  |  |  |  |  |  |  |  |
| OS for current or former smoking subpopulation | | | | | | | |  |  | OS for liver metastasis subpopulation | | | | | | |  |
| Treatment | Rank of possibility (%) | | | | | | |  |  | Treatment | Rank of possibility (%) | | | | | |  |
| 1 | 2 | 3 | 4 | 5 | 6 | 7 |  |  | 1 | 2 | 3 | 4 | 5 | 6 |  |
| Chemo | 1.4 | 6.0 | **17.1** | **26.2** | **25.4** | 17.3 | 6.6 |  |  | Chemo | 0.0 | 0.0 | 0.0 | 14.7 | **47.4** | 35.6 |  |
| Pembro+AP | **27.9** | 19.0 | 14.7 | 13.1 | 12.0 | 8.4 | 4.9 |  |  | Pembro+AP | **60.7** | 18.0 | 11.0 | 6.6 | 2.6 | 1.1 |  |
| Atezo+AP | 20.8 | **25.9** | 13.7 | 12.2 | 8.6 | 11.4 | 7.4 |  |  | Atezo+AP | 4.9 | 9.3 | 10.2 | 13.8 | 16.9 | **44.9** |  |
| TP+Bev | 1.4 | 8.6 | 14.0 | 18.8 | 23.1 | **23.4** | 10.6 |  |  | TP+Bev | 11.5 | **31.1** | **31.0** | 18.6 | 6.2 | 1.6 |  |
| Atezo+TP | 16.3 | 14.1 | 14.1 | 14.3 | 14.7 | 14.6 | 12.0 |  |  | Atezo+TP | 8.8 | 20.8 | 25.9 | **23.7** | 13.1 | 7.7 |  |
| AP+Bev | 22.4 | 20.5 | 15.8 | 9.5 | 6.8 | 10.1 | **14.9** |  |  | Nivo+AP | 11.5 | 22.6 | 19.2 | 23.0 | 14.4 | 9.4 |  |
| Nivo+AP | 13.9 | 21.8 | 16.8 | 16.6 | 11.8 | 10.2 | 9.1 |  |  |  |  |  |  |  |  |  |  |

| PFS for < 65 years subpopulation  B. | | | | | | | | |  | PFS for ≧65 years subpopulation | | | | | | | | |
| --- | --- | --- | --- | --- | --- | --- | --- | --- | --- | --- | --- | --- | --- | --- | --- | --- | --- | --- |
| Treatment | Rank of possibility (%) | | | | | | |  |  |  | Rank of possibility (%) | | | | | | | |
| 1 | 2 | 3 | 4 | 5 | 6 | 7 | 8 |  | 1 | 2 | 3 | 4 | 5 | 6 | 7 | 8 |
| Chemo | 0.0 | 0.0 | 0.0 | 0.0 | 0.0 | 0.0 | 10.6 | **89.4** |  | Chemo | 0.0 | 0.0 | 0.0 | 0.0 | 0.0 | 0.9 | 11.9 | **87.2** |
| Pembro+AP | **51.3** | 36.4 | 9.2 | 2.3 | 0.6 | 0.1 | 0.0 | 0.0 |  | Pembro+AP | 1.6 | 4.9 | 9.1 | 13.4 | 17.7 | 23.5 | **26.8** | 3.1 |
| Atezo+AP | 0.3 | 2.5 | 10.8 | **25.4** | **32.0** | 26.4 | 2.6 | 0.0 |  | Atezo+AP | **38.9** | **31.6** | 15.8 | 7.5 | 4.0 | 1.8 | 0.5 | 0.0 |
| GP+Bev | 0.0 | 0.0 | 0.0 | 0.4 | 2.0 | 9.7 | **77.8** | 10.1 |  | GP+Bev | 3.0 | 6.8 | 10.4 | 14.1 | 16.1 | 20.8 | 24.4 | 4.5 |
| TP+Bev | 0.1 | 8.3 | **52.2** | 25.3 | 10.7 | 3.4 | 0.1 | 0.0 |  | TP+Bev | 0.2 | 2.6 | 8.2 | 17.4 | **25.1** | **27.1** | 18.4 | 0.9 |
| Atezo+TC | 0.3 | 2.1 | 8.9 | 22.6 | 31.6 | **31.2** | 3.4 | 0.0 |  | Atezo+TC | 7.4 | 18.6 | **24.6** | **21.2** | 14.9 | 9.3 | 4.0 | 0.0 |
| AP+Bev | 47.1 | **46.2** | 5.5 | 1.0 | 0.2 | 0.0 | 0.0 | 0.0 |  | AP+Bev | 14.5 | 19.7 | 20.9 | 18.1 | 13.8 | 9.1 | 3.5 | 0.4 |
| Camre+AP | 1.2 | 4.8 | 13.4 | 22.8 | 24.0 | 28.2 | 5.5 | 0.2 |  | Camre+AP | 35.1 | 15.8 | 11.3 | 8.7 | 7.8 | 8.6 | 9.0 | 3.8 |
|  |  |  |  |  |  |  |  |  |  |  |  |  |  |  |  |  |  |  |
| PFS for male subpopulation | | | | | | | |  |  | PFS for female subpopulation | | | | | | | |  |
| Treatment | Rank of possibility (%) | | | | | | |  |  | Treatment | Rank of possibility (%) | | | | | | |  |
| 1 | 2 | 3 | 4 | 5 | 6 | 7 |  |  | 1 | 2 | 3 | 4 | 5 | 6 | 7 |  |
| Chemo | 0.0 | 0.0 | 0.0 | 0.0 | 0.1 | 39.9 | **59.9** |  |  | Chemo | 0.0 | 0.0 | 0.0 | 0.0 | 0.0 | 8.2 | **91.7** |  |
| Pembro+AP | 12.6 | 23.8 | 22.5 | 19.6 | 19.9 | 1.6 | 0.1 |  |  | Pembro+AP | **86.5** | 10.4 | 2.4 | 0.6 | 0.1 | 0.0 | 0.0 |  |
| Atezo+AP | 0.0 | 0.1 | 0.3 | 1.2 | 4.8 | **53.4** | 40.3 |  |  | Atezo+AP | 4.2 | 27.4 | 27.6 | 22.4 | 13.3 | 5.1 | 0.0 |  |
| GP+Bev | 0.2 | 3.8 | 15.9 | **31.0** | **46.0** | 3.0 | 0.1 |  |  | GP+Bev | 0.0 | 0.2 | 6.4 | 19.5 | **46.6** | 26.9 | 0.4 |  |
| TP+Bev | 6.6 | 19.5 | **28.5** | 25.3 | 19.0 | 1.0 | 0.0 |  |  | TP+Bev | 2.2 | 22.4 | **30.3** | **26.6** | 14.2 | 4.3 | 0.0 |  |
| Atezo+TC | 21.0 | **31.3** | 25.1 | 18.6 | 3.7 | 0.3 | 0.0 |  |  | Atezo+TC | 6.9 | **38.8** | 28.5 | 20.7 | 4.9 | 0.3 | 0.0 |  |
| AP+Bev | **57.7** | 20.0 | 10.7 | 6.6 | 4.7 | 0.3 | 0.0 |  |  | AP+Bev | 0.1 | 1.6 | 4.4 | 9.9 | 20.9 | **55.3** | 7.7 |  |

| PFS for ECOG0 subpopulation | | | | | | | |  | PFS for ECOG1 subpopulation | | | | | | | |
| --- | --- | --- | --- | --- | --- | --- | --- | --- | --- | --- | --- | --- | --- | --- | --- | --- |
| Treatment | Rank of possibility (%) | | | | | | |  | Treatment | Rank of possibility (%) | | | | | | |
| 1 | 2 | 3 | 4 | 5 | 6 | 7 |  | 1 | 2 | 3 | 4 | 5 | 6 | 7 |
| Chemo | 0.0 | 0.0 | 0.0 | 0.0 | 0.1 | 5.7 | **94.3** |  | Chemo | 0.0 | 0.0 | 0.0 | 0.0 | 0.0 | 3.1 | **96.9** |
| Pembro+AP | 21.8 | 31.4 | **25.3** | 13.4 | 6.9 | 1.3 | 0.0 |  | Pembro+AP | **48.8** | 23.2 | 14.4 | 8.9 | 4.3 | 0.5 | 0.0 |
| GP+Bev | 0.1 | 0.4 | 1.7 | 5.5 | 16.4 | **71.3** | 4.6 |  | GP+Bev | 0.0 | 0.2 | 0.8 | 3.5 | 15.2 | **77.6** | 2.6 |
| TC+Bev | 0.0 | 5.2 | 18.9 | **34.8** | **33.8** | 7.4 | 0.0 |  | TC+Bev | 0.4 | 12.4 | **31.0** | **32.3** | 21.0 | 2.9 | 0.0 |
| Atezo+TC | 5.3 | 15.9 | 25.2 | 26.4 | 19.7 | 7.5 | 0.0 |  | Atezo+TC | 4.3 | 11.1 | 16.3 | 25.2 | **34.8** | 8.2 | 0.1 |
| AP+Bev | 36.1 | **35.6** | 20.6 | 6.9 | 0.8 | 0.1 | 0.0 |  | AP+Bev | 33.6 | **35.8** | 20.4 | 8.4 | 1.6 | 0.2 | 0.0 |
| Camre+AP | **39.0** | 17.9 | 13.7 | 10.3 | 11.6 | 6.4 | 1.2 |  | Camre+AP | 12.7 | 17.4 | 16.9 | 21.9 | 23.3 | 7.6 | 0.3 |

| PFS for current or former smoking subpopulation | | | | | | |  |  | PFS for never smoking subpopulation | | | | | | | |
| --- | --- | --- | --- | --- | --- | --- | --- | --- | --- | --- | --- | --- | --- | --- | --- | --- |
| Treatment | Rank of possibility (%) | | | | | |  |  | Treatment | Rank of possibility (%) | | | | | | |
| 1 | 2 | 3 | 4 | 5 | 6 |  |  | 1 | 2 | 3 | 4 | 5 | 6 | 7 |
| Chemo | 0.0 | 0.0 | 0.0 | 0.4 | 1.9 | **97.7** |  |  | Chemo | 0.0 | 0.0 | 0.0 | 0.0 | 1.6 | 24.1 | **74.3** |
| Pembro+AP | **73.8** | 18.6 | 6.4 | 1.2 | 0.1 | 0.0 |  |  | Pembro+AP | 6.0 | 30.7 | 26.7 | 23.0 | 11.3 | 2.0 | 0.4 |
| Atezo+AP | 17.6 | **44.9** | 28.9 | 7.3 | 1.3 | 0.0 |  |  | Atezo+AP | 2.1 | 16.8 | 24.1 | **33.8** | 19.0 | 3.6 | 0.6 |
| TC+Bev | 0.0 | 0.1 | 0.7 | 10.5 | **87.1** | 1.7 |  |  | GP+Bev | 0.0 | 0.0 | 0.3 | 3.4 | 20.8 | **56.5** | 19.0 |
| Atezo+TC | 7.9 | 29.2 | **46.5** | 13.6 | 2.9 | 0.0 |  |  | TC+Bev | 0.1 | **40.1** | **38.2** | 18.0 | 3.5 | 0.1 | 0.0 |
| AP+Bev | 1.7 | 6.9 | 16.9 | **67.3** | 6.7 | 0.4 |  |  | Atezo+TP | 0.4 | 4.3 | 9.7 | 22.2 | **44.3** | 13.9 | 5.3 |
|  |  |  |  |  |  |  |  |  | AP+Bev | **91.2** | 7.7 | 0.9 | 0.2 | 0.0 | 0.0 | 0.0 |
